# Supplementary material for: Understanding the Usage of Content in a Mental Health Intervention for Depression: An Analysis of Log Data
Source: J Med Internet Res. 2014 Jan 31;16(1):e27. doi: 10.2196/jmir.2991 (PMC3936274; doi:10.2196/jmir.2991)
Supplement: Supplementary file 1 [file jmir_v16i1e27_app1.pdf]

## Multimedia Appendix1 – Detailed description of supportive or persuasive features Web-based “living to the full” intervention

### Feedback

Participants received weekly feedback. They have to view the feedback by clicking on the feedback option. Feedback messages were presented under ‘feedback’ in the personal home screen, accompanied by a picture of the care provider (Figure MA1.1). The feedback messages contain the key learning points and goal of the completed lesson; the key exercises and feedback on at least the core exercise; feedback on the mindfulness exercise; and a preview of the following lesson. Participants can view unique feedback messages and they can view feedback messages already sent to them (multiple viewed messages).

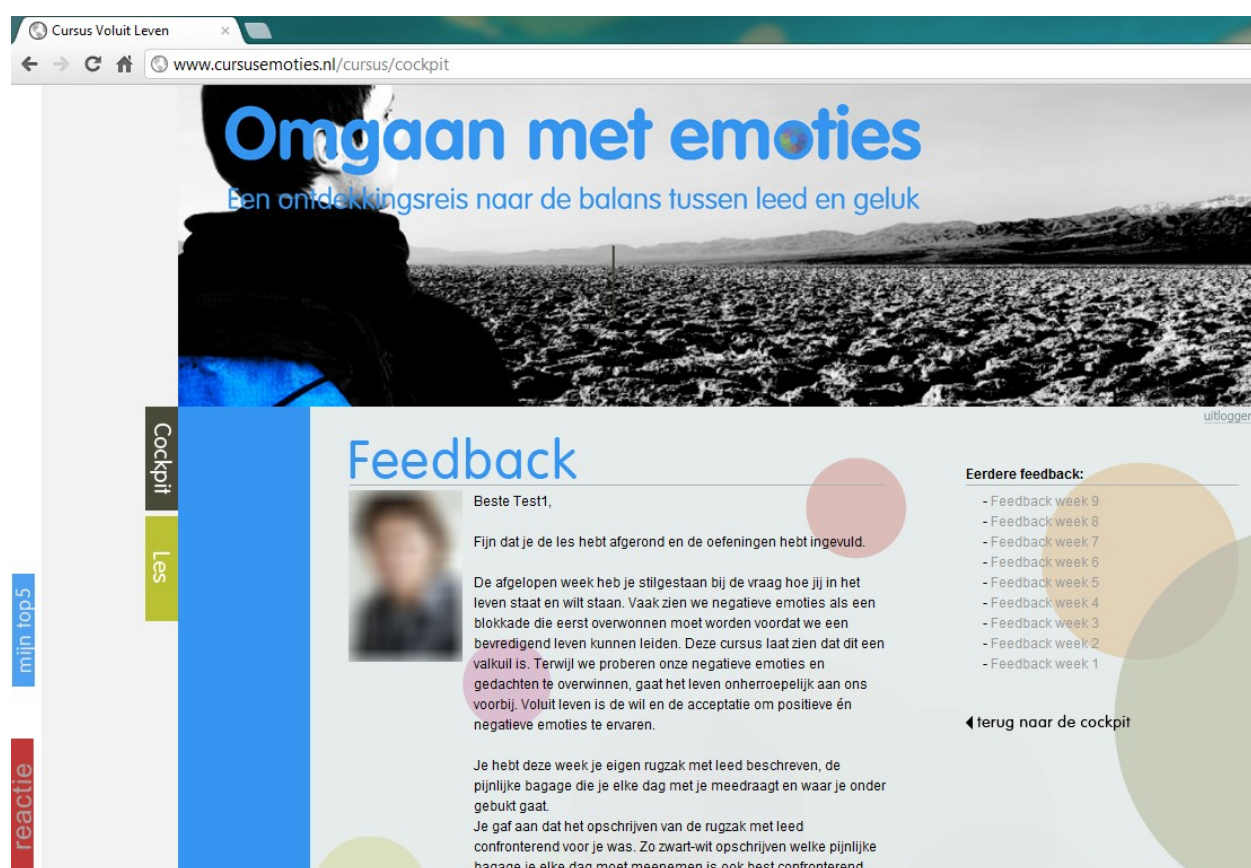

Figure MA1.1 – Feedback message Note: In this screenshot, the picture of the care-provider has been blurred for privacy.

### SMS-coach(text message)

Participants had the opportunity to turn the SMS-coach on. This SMS-coach sent 3 pre-designed text messages each week to a mobile phone number provided by the participant. The timing of the text messages was different each week, but all messages were sent between

9AM and 9PM. Each week one message contained a motivational message (e.g. “Do you realize you have taken the first step to learn to ‘live to the full’? Congratulations and keep going!”), one message contained a mindfulness trigger (e.g. “How mindful are you today?”) and one message reflected on the content of that week (e.g. “Avoidance is like scratching an itch. It only works for a short time.”) All text messages were presented in the ‘text message’ tab of the application, independent of whether the SMS-coach was turned on or off (Figure MA1.2). Participants can view the messages (unique and all previous sent messages) by clicking on the messages under “text messages” in the personal home screen, see figure MA1.2

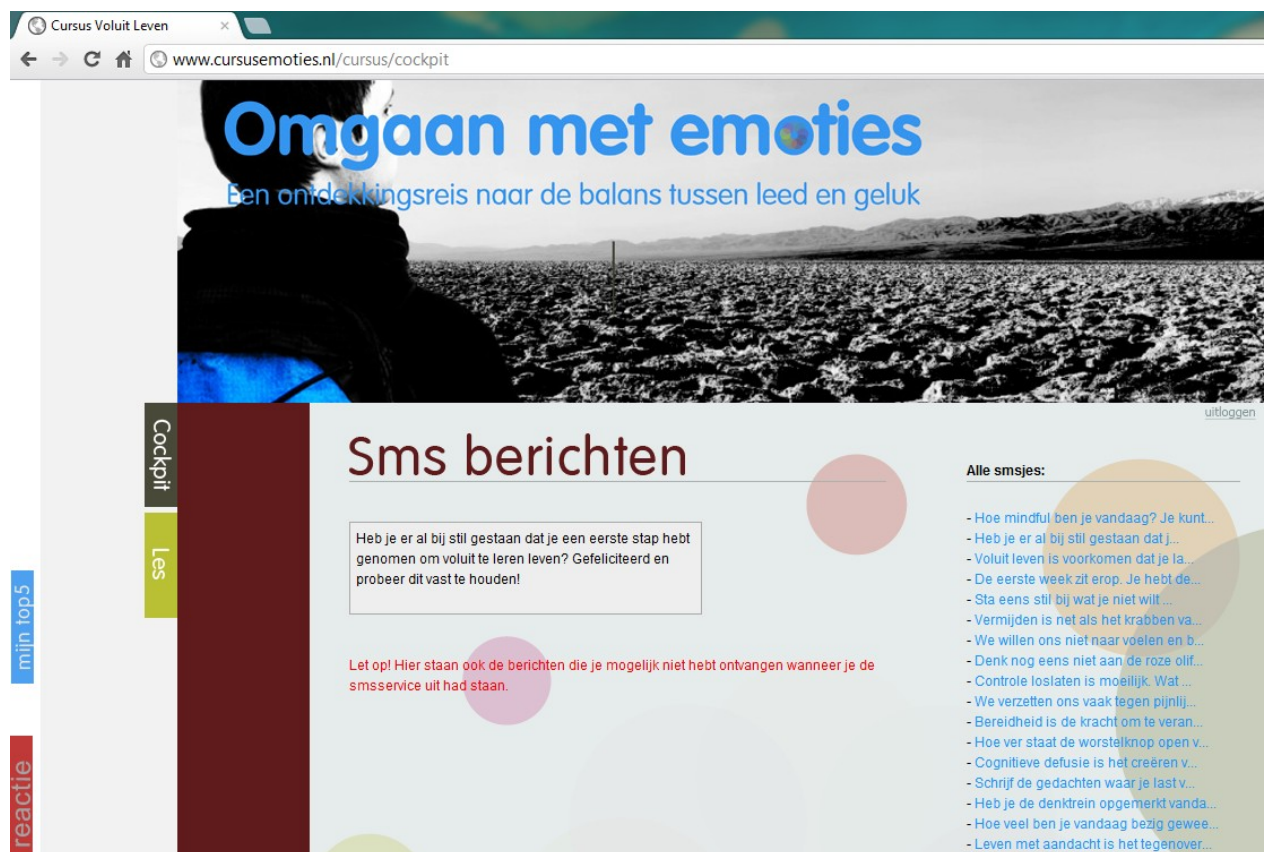

Figure MA1.2 – Text messages (and overview of all text message sent)

## Movies

In 8 of the 9 lessons, a short movie (for example 3 minutes) was added in which the writer of the course or an experienced clinical psychologist explains the key points of the lesson. The movie does not contain other information than the text, but the information is presented in a different way (Figure MA1.3). Participants can click on the movies that are embedded in the lessons; they can view unique movies and previous movies.

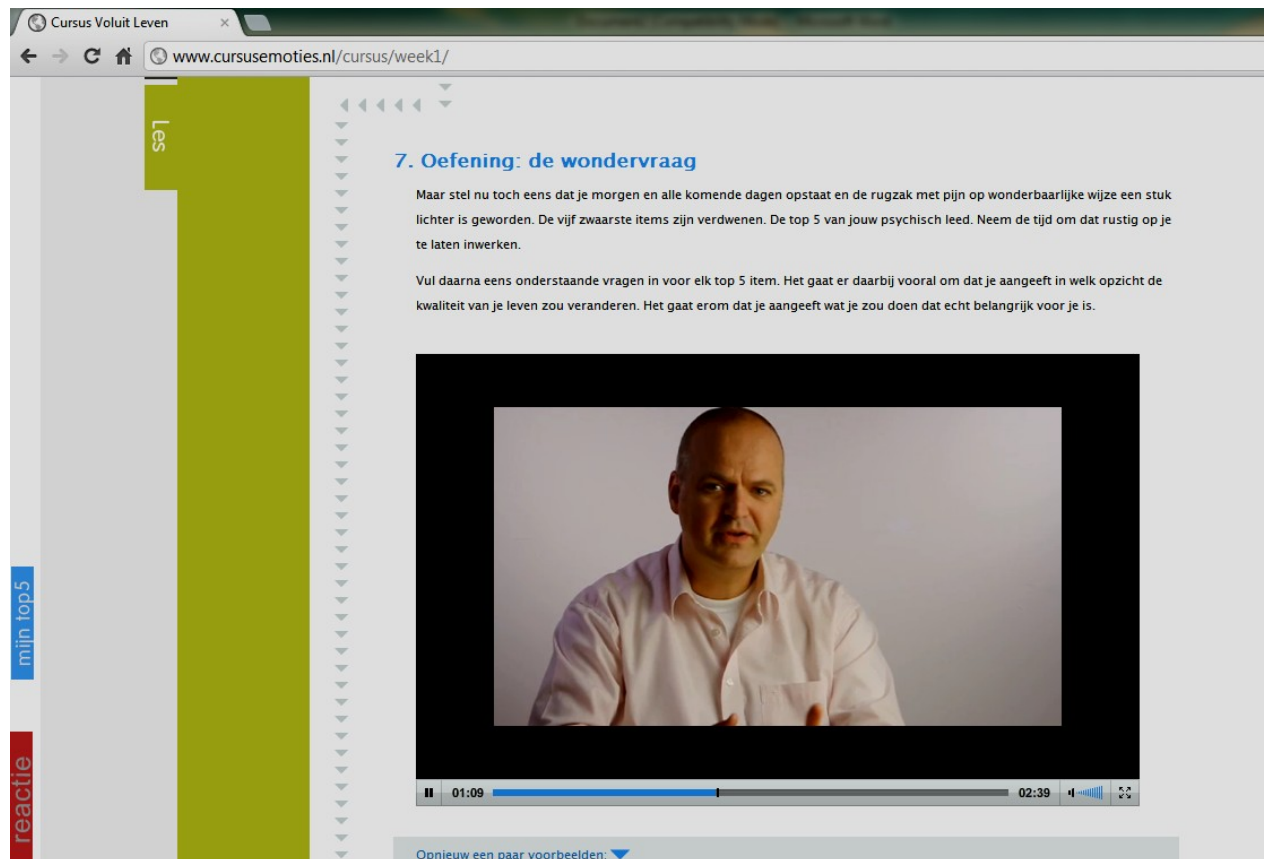

Figure MA1.3 – A movie (explanation of exercise)

### ***Success stories***

The intervention contained a success story for each of the lessons of the intervention that came available at the same time as the lessons. The participants accessed these stories from the cockpit, under 'experiences of others' and the stories were fictional, but based on the experiences of participants in an earlier study on the self-help book version of the intervention (Figure MA1.4). Participants can click on 'success stories' on the home screen to view unique stories and all previous sent stories during the course.

Cursus Voluit Leven

www.cursusemoties.nl/cursus/week9/

# Omgaan met emoties

Een ontdekkingsreis naar de balans tussen leed en geluk

Les 9: Ervoor blijven gaan

uitloggen

## Ervaringen van anderen

Test1, welkom bij dit onderdeel van de cursus. Deze week hebben we de ervaringen van Dennis(29), die ook de cursus heeft gevolgd. We hebben hem een paar vragen gesteld over zijn ervaringen met de cursus.

**Wat heeft de cursus voor jou betekend?**

Door het volgen van de cursus ben ik weer gaan autorijden (dit was de belangrijkste uitdaging toen ik aan de cursus begon). Het leren accepteren van mijn angst hiervoor was een heel belangrijke ervaring. Daarnaast ben ik door de cursus veel bewuster geworden van allerlei vermijdingstechnieken die ik in de loop van mijn leven heb opgebouwd. Door daar bewust van te worden ben ik meer mijn eigen leven gaan leiden en heb ik kwalitatief een beter leven gekregen.

**Wat vond je prettig aan les 4?**

Wat ik heel goed vond was "ruimte maken en toestaan wat er is". Dit heeft me heel goed geholpen in moeilijke situaties. Ook ben ik erg blij met het onderdeel

Alle ervaringsverhalen:

- Ervaringsverhaal week 1
- Ervaringsverhaal week 2
- Ervaringsverhaal week 3
- Ervaringsverhaal week 4
- Ervaringsverhaal week 5
- Ervaringsverhaal week 6
- Ervaringsverhaal week 7
- Ervaringsverhaal week 8
- Ervaringsverhaal week 9

◀terug naar de cockpit

Figure MA1.4 – Example of a success story (lesson 9; text of story; possibility to view other stories (week 1-9))

## Mindfulness

Participants can start a mindfulness exercise by clicking on the exercise, read or listen the information, and they can download the exercise for practicing, see figure MA1.5 . They can click on unique Mindfulness exercises as well as previous Mindfulness exercises.

inleiding

oefening

dagboek

metafoor

mindfulness

100% van les 2

uitloggen

8. Mindfulness oefening: observeren van de ademhaling

Deze week ga je oefenen met een nieuwe meditatieoefening. In de oefening volg je de ademhaling zoals die zich van moment tot moment aan je voordoet. Het is niet de bedoeling de ademhaling te veranderen, te sturen of te controleren. Bij sommige ademhalingsoefeningen kan bijvoorbeeld het doel zijn de adem te verdiepen. In deze oefening is dit niet de bedoeling. Wanneer dat gebeurt, is het OK en wanneer dit niet gebeurt, is dat ook OK. Het gaat puur om het volgen van de adem zoals die is. Het volgen van de ademhaling kan als een anker dienen om je in het nu te brengen.

Voor deze oefening is het nodig dat je de luidsprekers van de computer aanzet. Let ook op dat het volume ervan goed staat.

Observeren van de ademhaling

volume

voortgang

Wil je de mindfulness op je mp3-speler beluisteren, dan kan dat ook door [hier met rechter muisknop te klikken en het mp3-bestand te downloaden door op 'Doel opslaan als' te klikken](#).

NB. in sommige browsers staat in plaats van 'Doel opslaan als' iets anders zoals: 'koppeling opslaan', 'link opslaan' of 'download gekoppeld bestand'.

verder

terug

Figure MA1.5 – Example of a Mindfulness Exercise (read, listen to assignment, download exercise on mp3 )
